# Supplementary material
Source: PubMed Central journal article supplement (PMC3416963)
Supplement: NIHMS369580-supplement-1_si_001.pdf [file NIHMS369580-supplement-1_si_001.pdf]

# SUPPORTING INFORMATION

## Structure and Catalytic Mechanism of Ligl: Insight into the Amidohydrolase Enzymes of cog3618 and Lignin Degradation<sup>†</sup>

Merlin Eric Hobbs<sup>‡</sup>, Vladimir Malashkevich<sup>§</sup>, Howard J. Williams<sup>ψ</sup>, Chengfu Xu<sup>ψ</sup>, J.  
Michael Sauder<sup>φ</sup>, Stephen K. Burley<sup>φ</sup>, Steven C. Almo<sup>§\*</sup>, and Frank M. Raushel<sup>‡ψ\*</sup>

**Table S1:** Predicted LigI genes inferred from homology

| GI        | Organism                                                     | Locus Tag          | Max ID (NCBI) |
|-----------|--------------------------------------------------------------|--------------------|---------------|
| 351731544 | <i>Acidovorax radialis</i> N35                               | AradN_010100017295 | 55%           |
| 365086078 | <i>Acidovorax</i> sp. NO-1                                   | KYG_01097          | 55%           |
| 222082169 | <i>Agrobacterium radiobacter</i> K84                         | Arad_8733          | 54%           |
| 220914096 | <i>Arthrobacter chlorophenolicus</i> A6                      | Achl_3359          | 54%           |
| 359777281 | <i>Arthrobacter globiformis</i> NBRC 12137                   | ARGLB_069_00110    | 55%           |
| 116662338 | <i>Arthrobacter</i> sp. FB24                                 | Arth_4374          | 51%           |
| 329849573 | <i>Asticcacaulis biprosthecum</i> C19                        | ABI_24670          | 55%           |
| 119898830 | <i>Azoarcus</i> sp. BH72                                     | azo2539            | 56%           |
| 356881461 | <i>Azospirillum brasilense</i> Sp245                         | AZOBR_p310190      | 56%           |
| 148254161 | <i>Bradyrhizobium</i> sp. BTai1                              | BBta_2700          | 55%           |
| 146339359 | <i>Bradyrhizobium</i> sp. ORS 278                            | BRADO2340          | 53%           |
| 365275495 | <i>Bradyrhizobium</i> sp. ORS 285                            | BRAO285_120005     | 55%           |
| 302383231 | <i>Brevundimonas subvibrioides</i> ATCC 15264                | Bresu_2121         | 74%           |
| 186472070 | <i>Burkholderia phymatum</i> STM815                          | Bphy_3206          | 53%           |
| 341614854 | <i>Citromicrobium</i> sp. JLT1363                            | CJLT1_010100007853 | 76%           |
| 264678878 | <i>Comamonas testosteroni</i> CNB-2                          | CtCNB1_2743        | 54%           |
| 299532407 | <i>Comamonas testosteroni</i> S44                            | CTS44_16478        | 55%           |
| 260222182 | <i>Curvibacter putative symbiont of Hydra magnipapillata</i> | Csp_F37800         | 51%           |
| 160899880 | <i>Delftia acidovorans</i> SPH-1                             | Daci_4447          | 56%           |
| 333913324 | <i>Delftia</i> sp. Cs1-4                                     | DelCs14_1671       | 56%           |
| 333913996 | <i>Delftia</i> sp. Cs1-4                                     | DelCs14_2357       | 55%           |
| 90415600  | <i>gamma proteobacterium</i> HTCC2207                        | GB2207_09791       | 58%           |
| 254514232 | <i>gamma proteobacterium</i> NOR5-3                          | NOR53_1796         | 58%           |
| 254514752 | <i>gamma proteobacterium</i> NOR5-3                          | NOR53_1336         | 51%           |
| 332530760 | <i>Hylemonella gracilis</i> ATCC 19624                       | HGR_12477          | 55%           |
| 357394384 | <i>Kitasatospora setae</i> KM-6054                           | KSE_75150          | 55%           |
| 171060305 | <i>Leptothrix cholodnii</i> SP-6                             | Lcho_3635          | 53%           |
| 83309353  | <i>Magnetospirillum magneticum</i> AMB-1                     | amb0254            | 55%           |
| 23016548  | <i>Magnetospirillum magnetotacticum</i> MS-1                 | Magn03011001       | 56%           |
| 326794128 | <i>Marinomonas mediterranea</i> MMB-1                        | Marme_0834         | 54%           |
| 333906780 | <i>Marinomonas posidonica</i> IVIA-Po-181                    | Mar181_0382        | 51%           |
| 152997937 | <i>Marinomonas</i> sp. MWYL1                                 | Mmwyl1_3940        | 53%           |
| 84688103  | <i>Maritimibacter alkaliphilus</i> HTCC2654                  | RB2654_21003       | 56%           |
| 87200832  | <i>Novosphingobium aromaticivorans</i> DSM 12444             | Saro_2819          | 83%           |
| 359400972 | <i>Novosphingobium pentaromativorans</i> US6-1               | NSU_3632           | 84%           |
| 334145621 | <i>Novosphingobium</i> sp. PP1Y                              | PP1Y_Mpl10379      | 83%           |
| 121604930 | <i>Polaromonas naphthalenivorans</i> CJ2                     | Pnap_2029          | 54%           |
| 91790158  | <i>Polaromonas</i> sp. JS666                                 | Bpro_4322          | 55%           |
| 328544470 | <i>Polymorphum gilvum</i> SL003B-26A1                        | SL003B_2852        | 57%           |
| 109900186 | <i>Pseudoalteromonas atlantica</i> T6c                       | Patl_3887          | 52%           |
| 325002752 | <i>Pseudonocardia</i> sp. P1                                 | PseP1_010100028491 | 52%           |
| 337280123 | <i>Ramlibacter tataouinensis</i> TTB310                      | Rta_24780          | 55%           |
| 88799839  | <i>Reinekea blandensis</i> MED297                            | MED297_02915       | 54%           |
| 116248946 | <i>Rhizobium leguminosarum</i> bv. <i>viciae</i> 3841        | pRL120277          | 55%           |
| 254461538 | <i>Rhodobacteraceae</i> bacterium HTCC2083                   | RB2083_2129        | 57%           |
| 356667492 | <i>Rhodococcus opacus</i> PD630                              | OPAG_07973         | 56%           |
| 89899146  | <i>Rhodoferax ferrireducens</i> T118                         | Rfer_0332          | 54%           |
| 115522775 | <i>Rhodopseudomonas palustris</i> BisA53                     | RPE_0749           | 55%           |

---

|           |                                             |                    |     |
|-----------|---------------------------------------------|--------------------|-----|
| 91975464  | <i>Rhodopseudomonas palustris</i> BisB5     | RPD_0984           | 56% |
| 316936167 | <i>Rhodopseudomonas palustris</i> DX-1      | Rpdx1_4875         | 55% |
| 86748000  | <i>Rhodopseudomonas palustris</i> HaA2      | RPB_0874           | 54% |
| 192293539 | <i>Rhodopseudomonas palustris</i> TIE-1     | Rpal_5181          | 54% |
| 334343380 | <i>Sphingobium chlorophenolicum</i> L-1     | Sphch_3897         | 53% |
| 113473776 | <i>Sphingomonas</i> sp. KA1                 | pCAR3_098          | 83% |
| 291452252 | <i>Streptomyces albus</i> J1074             | SSHG_02545         | 56% |
| 357409779 | <i>Streptomyces flavogriseus</i> ATCC 33331 | Sfla_0533          | 51% |
| 291436208 | <i>Streptomyces ghanaensis</i> ATCC 14672   | SSFG_01312         | 54% |
| 329937281 | <i>Streptomyces griseoaurantiacus</i> M045  | SGM_2372           | 55% |
| 302559216 | <i>Streptomyces griseoflavus</i> Tu4000     | SSRG_02731         | 53% |
| 359151387 | <i>Streptomyces</i> sp. S4                  | StrS4_010100031750 | 56% |
| 344997778 | <i>Streptomyces</i> sp. SirexAA-E           | SACTE_0140         | 54% |
| 345015780 | <i>Streptomyces violaceusniger</i> Tu 4113  | Strvi_8545         | 51% |
| 239820758 | <i>Variovorax paradoxus</i> S110            | Vapar_6113         | 56% |
| 121607172 | <i>Verminephrobacter eiseniae</i> EF01-2    | Veis_0169          | 53% |
| 260767376 | <i>Vibrio furnissii</i> CIP 102972          | VFA_000428         | 57% |
| 153831912 | <i>Vibrio harveyi</i> HY01                  | A1Q_3973           | 53% |

---
